# Supplementary material
Source: PubMed Central journal article supplement (PMC5666609)
Supplement: EMBR-18-2067-s001.pdf [file EMBR-18-2067-s001.pdf]

**Appendix**

**Table of Contents**

**Appendix Table S1: The results of the statistical analyses of the figures.....2**

**Appendix Table S2: The results of the statistical analyses of the expanded view figures.....3**

# Appendix Table S1: The results of the statistical analyses of the figures

**A**

**Figure 2A**  
Two-way ANOVA followed by Dunnett's multiple comparisons test

|         | 37°C | cold |
|---------|------|------|
| (-)     |      |      |
| 2 hours | ns   |      |
| 4 hours | ns   |      |
| 8 hours | **** |      |

**B**

**Figure 2B**  
Two-way ANOVA followed by Tukey's multiple comparisons test

|               | 37°C | cold |
|---------------|------|------|
| ctrl#1        | ns   | ns   |
| ctrl#1 ASK1#1 | ns   | **** |
| ctrl#1 ASK1#3 | ns   | ***  |
| ctrl#2 ASK1#1 | ns   | **** |
| ctrl#2 ASK1#3 | ns   | ***  |
| ASK1#1 ASK1#3 | ns   | ns   |

**C**

**Figure 2D**  
Two-way ANOVA followed by Tukey's multiple comparisons test

|                     | 37°C | cold |
|---------------------|------|------|
| DMSO SB 202190      | ns   | **** |
| DMSO SB 203580      | ns   | **** |
| DMSO SB 202474      | ns   | ns   |
| SB SB 202190 203580 | ns   | ns   |
| SB SB 202190 202474 | ns   | **** |
| SB SB 203580 202474 | ns   | **** |

**D**

**Figure 2E**  
Two-way ANOVA followed by Tukey's multiple comparisons test

|               | 37°C | cold |
|---------------|------|------|
| ctrl#1        | ns   | **** |
| ctrl#1        | ns   | ns   |
| ctrl#1 ASK1#1 | ns   | **   |
| ctrl#1 ASK1#2 | ns   | **** |
| ctrl#1 ASK1#3 | ns   | **** |
| ctrl#2        | ns   | **   |
| ctrl#2        | ns   | **** |
| ctrl#2 ASK1#2 | ns   | **** |
| ctrl#2 ASK1#3 | ns   | **** |
| ctrl#3 ASK1#1 | ns   | **** |
| ctrl#3 ASK1#2 | ns   | **** |
| ctrl#3 ASK1#3 | ns   | **** |
| ASK1#1 ASK1#2 | ns   | ns   |
| ASK1#1 ASK1#3 | ns   | ns   |
| ASK1#2 ASK1#3 | ns   | ns   |

**E**

**Figure 2G**  
Two-way ANOVA followed by Tukey's multiple comparisons test

|                     | 37°C | cold |
|---------------------|------|------|
| DMSO SB 202190      | ns   | **** |
| DMSO SB 202474      | ns   | **** |
| SB SB 202190 202474 | ns   | *    |

**F**

**Figure 2H**  
Two-way ANOVA followed by Tukey's multiple comparisons test

|                     | 37°C | cold |
|---------------------|------|------|
| DMSO SB 202190      | ns   | **** |
| DMSO SB 202474      | ns   | ***  |
| SB SB 202190 202474 | ns   | **** |

**G**

**Figure 2I**  
Two-way ANOVA followed by Tukey's multiple comparisons test

|                     | 37°C | cold |
|---------------------|------|------|
| DMSO SB 202190      | ns   | **   |
| DMSO SB 202474      | ns   | ns   |
| SB SB 202190 202474 | ns   | *    |

**H**

**Figure 4A**  
Two-way ANOVA followed by Tukey's multiple comparisons test

|             | 37°C | cold |
|-------------|------|------|
| DMSO Fer-1  | ns   | **** |
| DMSO U0124  | ns   | *    |
| DMSO U0126  | ns   | **** |
| Fer-1 U0124 | ns   | **   |
| Fer-1 U0126 | ns   | ns   |
| U0124 U0126 | ns   | **   |

**I**

**Figure 6A**  
Two-way ANOVA followed by Tukey's multiple comparisons test

| Erastin [μM] | DMSO  |       | Fer-1 |       | U0124 |       |
|--------------|-------|-------|-------|-------|-------|-------|
|              | U0124 | U0126 | U0124 | U0126 | U0124 | U0126 |
| 0.625        | ns    | ns    | ns    | ns    | ns    | ns    |
| 1.25         | ns    | ns    | ns    | ns    | ns    | ns    |
| 2.5          | ns    | ns    | ns    | ns    | ns    | ns    |
| 5            | ****  | ****  | ****  | ****  | ns    | ****  |
| 10           | ****  | ns    | ****  | ****  | ns    | ****  |

**J**

**Figure 6B**  
Two-way ANOVA followed by Bonferroni's multiple comparisons test

| Erastin [μM] | MilliQ | Dfx |
|--------------|--------|-----|
| 0.625        | ns     |     |
| 1.25         | ns     |     |
| 2.5          | ns     |     |
| 5            | ****   |     |
| 10           | ****   |     |

**K**

**Figure 6C**  
Two-way ANOVA followed by Tukey's multiple comparisons test

| Erastin [μM] | DMSO     |          | SB202190 |
|--------------|----------|----------|----------|
|              | SB202190 | SB202474 | SB202474 |
| 0.625        | ns       | ns       | ns       |
| 1.25         | ns       | ns       | *        |
| 2.5          | ns       | ns       | ns       |
| 5            | ****     | ns       | ****     |
| 10           | ****     | ns       | ****     |

**L**

**Figure 6D**  
Two-way ANOVA followed by Tukey's multiple comparisons test

| siRNA | ct#1 |      | ct#2    |         |         | ct#3 |         |         | ASK1 #1 |         |         | ASK1 #2 |         |         | ASK1 #3 |  |  |
|-------|------|------|---------|---------|---------|------|---------|---------|---------|---------|---------|---------|---------|---------|---------|--|--|
|       | ct#2 | ct#3 | ASK1 #1 | ASK1 #2 | ASK1 #3 | ct#3 | ASK1 #1 | ASK1 #2 | ASK1 #3 | ASK1 #1 | ASK1 #2 | ASK1 #3 | ASK1 #2 | ASK1 #3 | ASK1 #3 |  |  |
| 312.5 | ns   | ns   | ns      | ns      | ns      | ns   | ns      | ns      | ns      | ns      | ns      | ns      | ns      | ns      | ns      |  |  |
| 625   | ns   | ns   | ns      | ns      | ns      | ns   | ns      | ns      | ns      | ns      | ns      | ns      | ns      | ns      | ns      |  |  |
| 1250  | ns   | ns   | ns      | **      | ****    | ns   | ns      | ****    | ****    | **      | ****    | ****    | ns      | *       | ns      |  |  |
| 2500  | ns   | ns   | ns      | ns      | ns      | ns   | ns      | ns      | ns      | ns      | ns      | ns      | ns      | *       | ns      |  |  |
| 5000  | ns   | ns   | ns      | ns      | ns      | ns   | ns      | ns      | ns      | ns      | ns      | ns      | ns      | ns      | ns      |  |  |
| 10000 | ns   | ns   | ns      | ns      | ns      | ns   | ns      | ns      | ns      | ns      | ns      | ns      | ns      | ns      | ns      |  |  |

**M**

**Figure 6G**  
Two-way ANOVA followed by Tukey's multiple comparisons test

| siRNA  | ct#1 |      | ct#2    |         |         | ct#3 |         |         | ASK1 #1 |         |         | ASK1 #2 |         |         | ASK1 #3 |  |  |
|--------|------|------|---------|---------|---------|------|---------|---------|---------|---------|---------|---------|---------|---------|---------|--|--|
|        | ct#2 | ct#3 | ASK1 #1 | ASK1 #2 | ASK1 #3 | ct#3 | ASK1 #1 | ASK1 #2 | ASK1 #3 | ASK1 #2 | ASK1 #3 | ASK1 #3 | ASK1 #2 | ASK1 #3 | ASK1 #3 |  |  |
| 15.625 | ns   | ns   | ns      | ns      | ns      | ns   | ns      | ns      | ns      | ns      | ns      | ns      | ns      | ns      | ns      |  |  |
| 31.25  | ns   | ns   | ns      | ns      | ns      | ns   | ns      | *       | ***     | ns      | ns      | **      | ns      | ns      | ns      |  |  |
| 62.5   | ns   | **   | ns      | *       | *       | ns   | *       | ****    | ****    | ****    | ****    | ****    | ns      | ns      | ns      |  |  |
| 125    | ns   | **** | ns      | *       | ***     | *    | ***     | ****    | ****    | ****    | ****    | ****    | ns      | ns      | ns      |  |  |
| 250    | ns   | **   | ns      | *       | ****    | ns   | ***     | ****    | ****    | ****    | ****    | ****    | ns      | ns      | ns      |  |  |
| 500    | ns   | *    | *       | ns      | **      | ns   | ***     | *       | ***     | ****    | ****    | ****    | ns      | ns      | ns      |  |  |
| 1000   | ns   | ns   | **      | ns      | ns      | ns   | ***     | ns      | ns      | ****    | **      | ****    | ns      | ns      | ns      |  |  |
| 2000   | ns   | ns   | *       | ns      | ns      | ns   | **      | ns      | ns      | ****    | ns      | *       | *       | ns      | ns      |  |  |
| 4000   | ns   | ns   | ns      | ns      | ns      | ns   | ns      | ns      | ns      | ****    | ns      | ns      | ns      | ns      | ns      |  |  |



Figure EV5A

|            |    | #1  |   | #2  |    | #1  |    | #2 |    | #1 |  | #2  |     |
|------------|----|-----|---|-----|----|-----|----|----|----|----|--|-----|-----|
| ctrl siRNA |    |     |   |     |    |     |    |    |    |    |  |     |     |
| ctrl siRNA | #1 |     |   |     |    |     |    |    |    |    |  |     |     |
|            | #2 | ns  |   |     |    |     |    |    |    |    |  |     |     |
| GPX4 siRNA | #1 | *** | * | *** | ** | *** | ** |    |    |    |  | ns  | ns  |
|            | #2 | **  | * | **  | ** | *** | ** |    |    |    |  | ns  | ns  |
| ASK1 siRNA | #1 |     |   | ns  | ns | ns  | ns |    |    |    |  | **  | **  |
|            | #2 |     |   |     | ns | ns  | ns |    |    |    |  | *   | *   |
|            | #1 |     |   |     |    | ns  | ns |    |    |    |  | *** | **  |
|            | #2 |     |   |     |    |     | ns |    |    |    |  | **  | **  |
|            | #1 |     |   |     |    |     |    | ns |    |    |  | *** | *** |
|            | #2 |     |   |     |    |     |    |    | ns |    |  | **  | **  |
|            | #1 |     |   |     |    |     |    |    |    |    |  |     | ns  |
|            | #2 |     |   |     |    |     |    |    |    |    |  |     |     |

One-way ANOVA followed by Tukey's multiple comparisons test
