# Supplementary material
Source: PubMed Central journal article supplement (PMC5666609)

Figure 1A

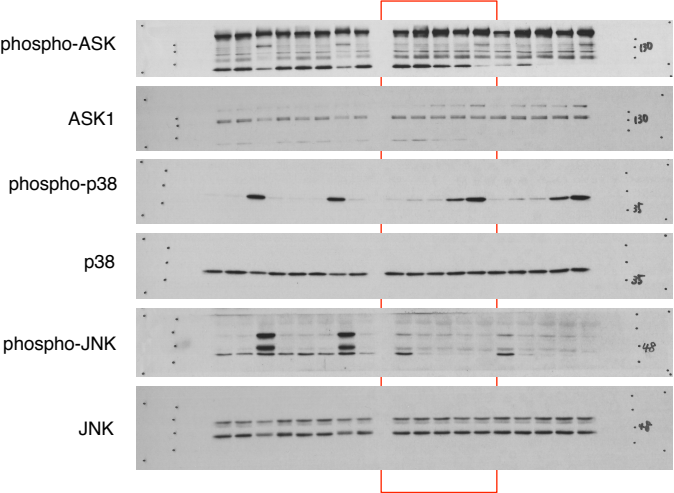

Figure 1C

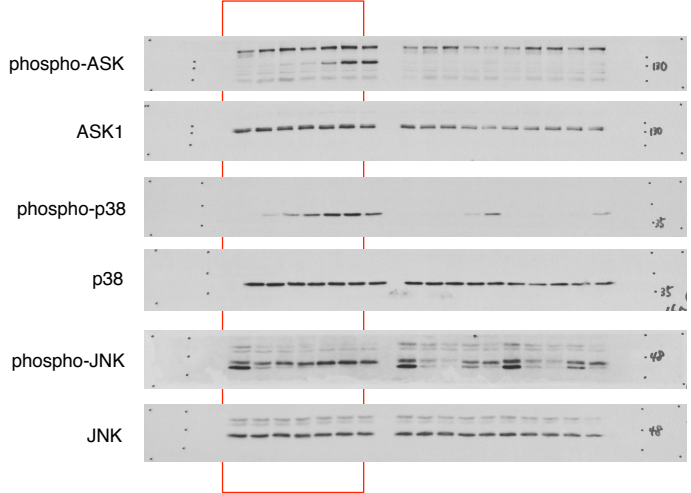

Figure 1D

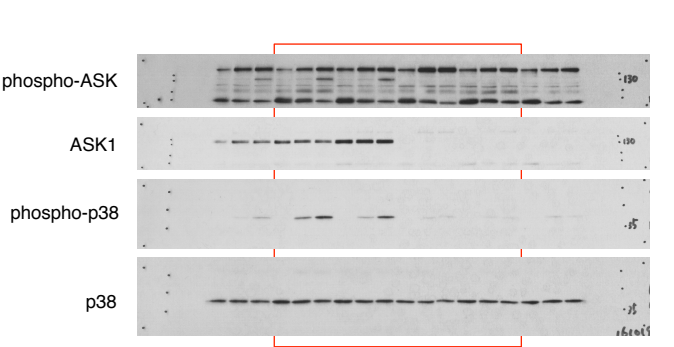

Figure 1E

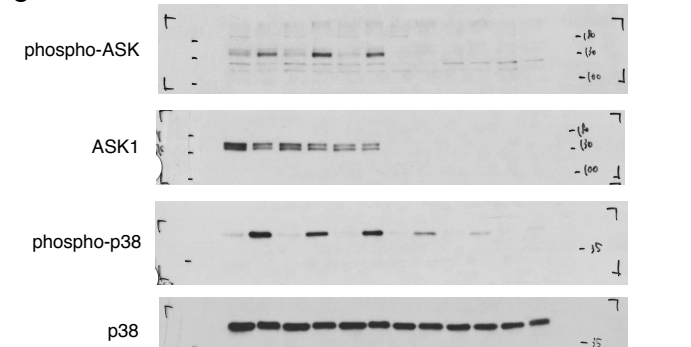

Figure 1F

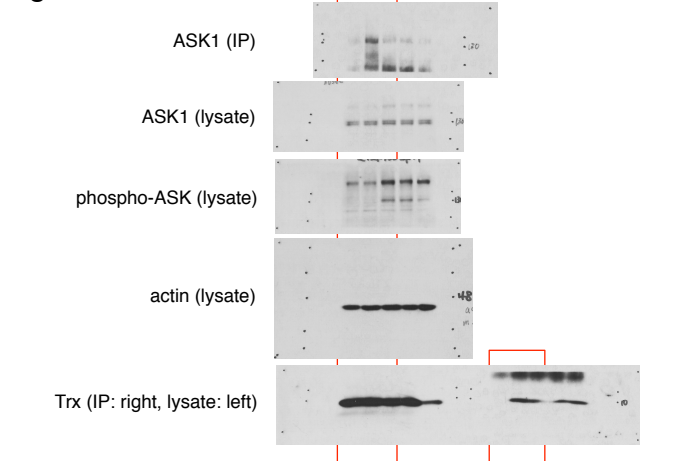

Supplement: EMBR-18-2067-s004.pdf [file EMBR-18-2067-s004.pdf]

Figure 2C

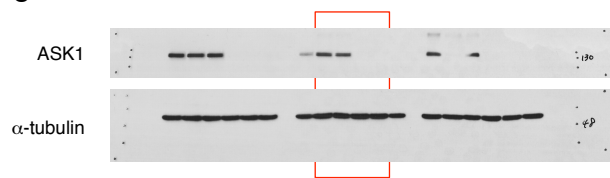

Figure 2F

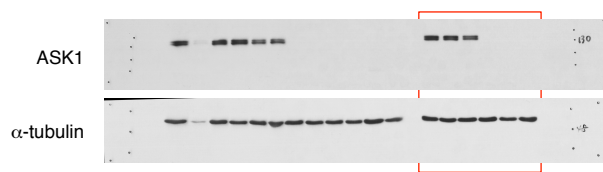

Supplement: EMBR-18-2067-s005.pdf [file EMBR-18-2067-s005.pdf]

Figure 4D

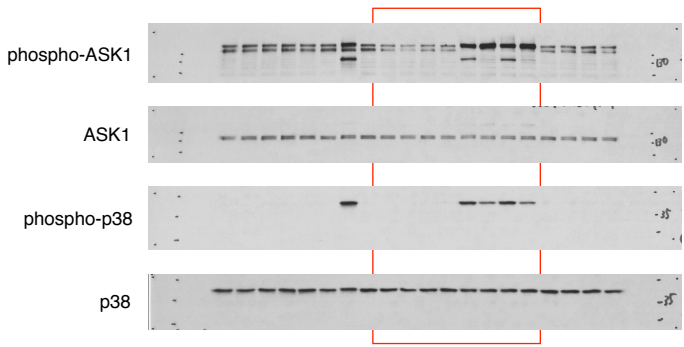

Figure 4E

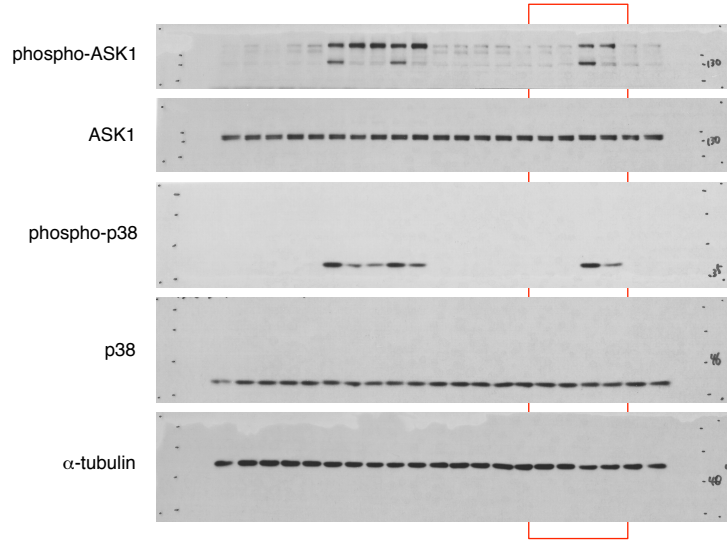

Supplement: EMBR-18-2067-s006.pdf [file EMBR-18-2067-s006.pdf]

Figure 5A

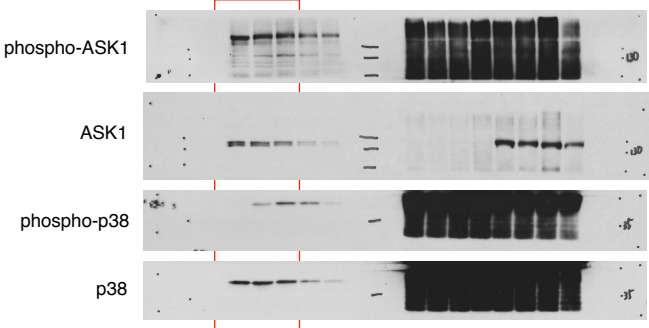

Figure 5B

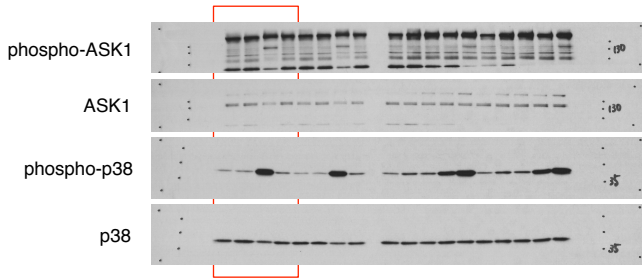

Figure 5C

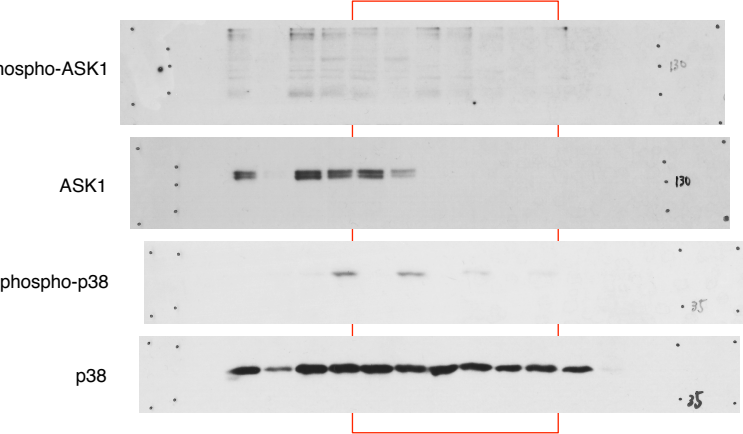

Supplement: EMBR-18-2067-s007.pdf [file EMBR-18-2067-s007.pdf]

Figure 6E

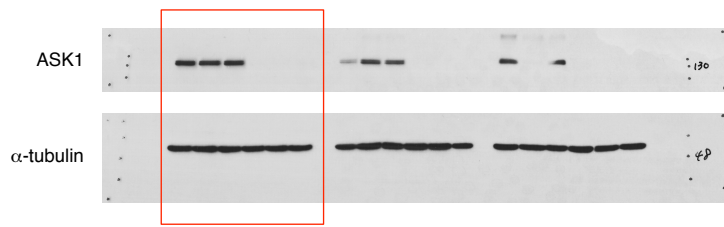

Supplement: EMBR-18-2067-s008.pdf [file EMBR-18-2067-s008.pdf]
